# Supplementary material for: Outer Membrane Vesicles From Fusobacterium nucleatum Switch M0-Like Macrophages Toward the M1 Phenotype to Destroy Periodontal Tissues in Mice
Source: Front Microbiol. 2022 Mar 21;13:815638. doi: 10.3389/fmicb.2022.815638 (PMC8981991; doi:10.3389/fmicb.2022.815638)
Supplement: Supplementary file 4 [file Table_1.XLSX]

## Sheet: 0.05过滤-鉴定及定量蛋白列表
prot_hit_num	prot_acc	prot_desc	prot_score	prot_mass	prot_matches	prot_matches_sig	prot_sequences	prot_sequences_sig	prot_cover	prot_pi	emPAI
1	tr|Q8RHY1|Q8RHY1_FUSNN	Major outer membrane protein OS=Fusobacterium nucleatum subsp. nucleatum (strain ATCC 25586 / DSM 15643 / BCRC 10681 / CIP 101130 / JCM 8532 / KCTC 2640 / LMG 13131 / VPI 4355) OX=190304 GN=FN1859 PE=4 SV=1	10328	42347	322	322	26	26	49.7	9.24	26.17
2	sp|Q8RFN7|PGK_FUSNN	Phosphoglycerate kinase OS=Fusobacterium nucleatum subsp. nucleatum (strain ATCC 25586 / DSM 15643 / BCRC 10681 / CIP 101130 / JCM 8532 / KCTC 2640 / LMG 13131 / VPI 4355) OX=190304 GN=pgk PE=3 SV=1	698	42866	28	28	17	17	36.7	5.62	4.52
3	tr|Q8RIN6|Q8RIN6_FUSNN	Acyl-CoA dehydrogenase, short-chain specific OS=Fusobacterium nucleatum subsp. nucleatum (strain ATCC 25586 / DSM 15643 / BCRC 10681 / CIP 101130 / JCM 8532 / KCTC 2640 / LMG 13131 / VPI 4355) OX=190304 GN=FN1535 PE=3 SV=1	641	41750	26	26	14	14	37	5.21	3.59
4	sp|Q8RDT4|MEGL_FUSNN	L-methionine gamma-lyase OS=Fusobacterium nucleatum subsp. nucleatum (strain ATCC 25586 / DSM 15643 / BCRC 10681 / CIP 101130 / JCM 8532 / KCTC 2640 / LMG 13131 / VPI 4355) OX=190304 GN=FN1419 PE=1 SV=1	467	43449	12	12	9	9	21	6.15	1.08
5	tr|Q8R674|Q8R674_FUSNN	Acyl-CoA dehydrogenase OS=Fusobacterium nucleatum subsp. nucleatum (strain ATCC 25586 / DSM 15643 / BCRC 10681 / CIP 101130 / JCM 8532 / KCTC 2640 / LMG 13131 / VPI 4355) OX=190304 GN=FN0783 PE=3 SV=1	454	41898	14	14	10	10	27.3	8.2	1.31
6	tr|Q8RET7|Q8RET7_FUSNN	Outer membrane protein P1 OS=Fusobacterium nucleatum subsp. nucleatum (strain ATCC 25586 / DSM 15643 / BCRC 10681 / CIP 101130 / JCM 8532 / KCTC 2640 / LMG 13131 / VPI 4355) OX=190304 GN=FN1003 PE=4 SV=1	418	30470	12	12	5	5	19	9.19	1.06
7	tr|Q8RIB8|Q8RIB8_FUSNN	N-acetylneuraminate synthase OS=Fusobacterium nucleatum subsp. nucleatum (strain ATCC 25586 / DSM 15643 / BCRC 10681 / CIP 101130 / JCM 8532 / KCTC 2640 / LMG 13131 / VPI 4355) OX=190304 GN=FN1684 PE=4 SV=1	388	39873	17	17	13	13	31.9	5.98	2.58
8	tr|Q8RGI5|Q8RGI5_FUSNN	Iron(III)-binding protein OS=Fusobacterium nucleatum subsp. nucleatum (strain ATCC 25586 / DSM 15643 / BCRC 10681 / CIP 101130 / JCM 8532 / KCTC 2640 / LMG 13131 / VPI 4355) OX=190304 GN=FN0308 PE=4 SV=1	385	39604	12	12	9	9	27.8	4.89	1.23
9	tr|Q8RG24|Q8RG24_FUSNN	Acetyl-CoA acetyltransferase OS=Fusobacterium nucleatum subsp. nucleatum (strain ATCC 25586 / DSM 15643 / BCRC 10681 / CIP 101130 / JCM 8532 / KCTC 2640 / LMG 13131 / VPI 4355) OX=190304 GN=FN0495 PE=3 SV=1	264	42534	12	12	7	7	14.9	6.62	0.96
10	tr|Q8RGC9|Q8RGC9_FUSNN	Iron(III)-binding protein OS=Fusobacterium nucleatum subsp. nucleatum (strain ATCC 25586 / DSM 15643 / BCRC 10681 / CIP 101130 / JCM 8532 / KCTC 2640 / LMG 13131 / VPI 4355) OX=190304 GN=FN0375 PE=4 SV=1	247	39066	11	11	8	8	24.7	4.75	1.25
11	tr|Q8R6B3|Q8R6B3_FUSNN	(R)-2-hydroxyglutaryl-CoA dehydratase beta-subunit OS=Fusobacterium nucleatum subsp. nucleatum (strain ATCC 25586 / DSM 15643 / BCRC 10681 / CIP 101130 / JCM 8532 / KCTC 2640 / LMG 13131 / VPI 4355) OX=190304 GN=FN0208 PE=3 SV=1	246	44123	8	8	6	6	16.2	5.15	0.78
12	sp|Q8RED7|ACKA_FUSNN	Acetate kinase OS=Fusobacterium nucleatum subsp. nucleatum (strain ATCC 25586 / DSM 15643 / BCRC 10681 / CIP 101130 / JCM 8532 / KCTC 2640 / LMG 13131 / VPI 4355) OX=190304 GN=ackA PE=3 SV=1	191	43996	5	5	5	5	13.6	5.94	0.44
13	tr|Q8RHT6|Q8RHT6_FUSNN	Glycerophosphoryl diester phosphodiesterase OS=Fusobacterium nucleatum subsp. nucleatum (strain ATCC 25586 / DSM 15643 / BCRC 10681 / CIP 101130 / JCM 8532 / KCTC 2640 / LMG 13131 / VPI 4355) OX=190304 GN=FN1908 PE=4 SV=1	182	41142	8	8	6	6	11.2	6.81	0.72
14	sp|Q8RGX8|PLSX_FUSNN	Phosphate acyltransferase OS=Fusobacterium nucleatum subsp. nucleatum (strain ATCC 25586 / DSM 15643 / BCRC 10681 / CIP 101130 / JCM 8532 / KCTC 2640 / LMG 13131 / VPI 4355) OX=190304 GN=plsX PE=3 SV=1	182	36545	7	7	6	6	16.3	6.81	0.84
15	tr|Q8RHR6|Q8RHR6_FUSNN	Uncharacterized protein OS=Fusobacterium nucleatum subsp. nucleatum (strain ATCC 25586 / DSM 15643 / BCRC 10681 / CIP 101130 / JCM 8532 / KCTC 2640 / LMG 13131 / VPI 4355) OX=190304 GN=FN1933 PE=4 SV=1	180	41299	5	5	4	4	14.1	8.77	0.47
16	sp|Q8RGC8|FBPC_FUSNN	Fe(3+) ions import ATP-binding protein FbpC OS=Fusobacterium nucleatum subsp. nucleatum (strain ATCC 25586 / DSM 15643 / BCRC 10681 / CIP 101130 / JCM 8532 / KCTC 2640 / LMG 13131 / VPI 4355) OX=190304 GN=fbpC PE=3 SV=1	177	41874	6	6	5	5	14	6.58	0.58
17	tr|Q8RHM8|Q8RHM8_FUSNN	YARHG domain-containing protein OS=Fusobacterium nucleatum subsp. nucleatum (strain ATCC 25586 / DSM 15643 / BCRC 10681 / CIP 101130 / JCM 8532 / KCTC 2640 / LMG 13131 / VPI 4355) OX=190304 GN=FN1986 PE=4 SV=1	173	38892	8	8	7	7	21.7	8.2	0.92
18	tr|Q8RFJ6|Q8RFJ6_FUSNN	Protein translocase subunit SecD OS=Fusobacterium nucleatum subsp. nucleatum (strain ATCC 25586 / DSM 15643 / BCRC 10681 / CIP 101130 / JCM 8532 / KCTC 2640 / LMG 13131 / VPI 4355) OX=190304 GN=secD PE=3 SV=1	163	44155	3	3	3	3	9.5	5.28	0.24
19	tr|Q8RG48|Q8RG48_FUSNN	Putative efflux pump component MtrF OS=Fusobacterium nucleatum subsp. nucleatum (strain ATCC 25586 / DSM 15643 / BCRC 10681 / CIP 101130 / JCM 8532 / KCTC 2640 / LMG 13131 / VPI 4355) OX=190304 GN=FN0470 PE=4 SV=1	160	55153	6	6	6	6	11.9	8.92	0.42
20	tr|Q8RFS0|Q8RFS0_FUSNN	DNA polymerase III, beta chain OS=Fusobacterium nucleatum subsp. nucleatum (strain ATCC 25586 / DSM 15643 / BCRC 10681 / CIP 101130 / JCM 8532 / KCTC 2640 / LMG 13131 / VPI 4355) OX=190304 GN=FN0617 PE=3 SV=1	155	41584	3	3	3	3	9.6	5.33	0.26
21	tr|Q8RI02|Q8RI02_FUSNN	Tetratricopeptide repeat family protein OS=Fusobacterium nucleatum subsp. nucleatum (strain ATCC 25586 / DSM 15643 / BCRC 10681 / CIP 101130 / JCM 8532 / KCTC 2640 / LMG 13131 / VPI 4355) OX=190304 GN=FN1836 PE=4 SV=1	151	109781	5	5	5	5	6.3	8.76	0.16
22	tr|Q8R643|Q8R643_FUSNN	Pyruvate-flavodoxin oxidoreductase OS=Fusobacterium nucleatum subsp. nucleatum (strain ATCC 25586 / DSM 15643 / BCRC 10681 / CIP 101130 / JCM 8532 / KCTC 2640 / LMG 13131 / VPI 4355) OX=190304 GN=FN1170 PE=3 SV=1	140	132250	5	5	5	5	4	6.01	0.13
23	tr|Q8RGI3|Q8RGI3_FUSNN	Iron(III)-transport ATP-binding protein sfuC OS=Fusobacterium nucleatum subsp. nucleatum (strain ATCC 25586 / DSM 15643 / BCRC 10681 / CIP 101130 / JCM 8532 / KCTC 2640 / LMG 13131 / VPI 4355) OX=190304 GN=FN0310 PE=4 SV=1	140	40071	7	7	6	6	16.6	5.86	0.74
24	tr|Q8RIP5|Q8RIP5_FUSNN	Fusobacterium outer membrane protein family OS=Fusobacterium nucleatum subsp. nucleatum (strain ATCC 25586 / DSM 15643 / BCRC 10681 / CIP 101130 / JCM 8532 / KCTC 2640 / LMG 13131 / VPI 4355) OX=190304 GN=FN1526 PE=4 SV=1	134	221530	5	5	5	5	2.5	9.13	0.08
25	tr|Q8RDQ8|Q8RDQ8_FUSNN	Integral membrane protein OS=Fusobacterium nucleatum subsp. nucleatum (strain ATCC 25586 / DSM 15643 / BCRC 10681 / CIP 101130 / JCM 8532 / KCTC 2640 / LMG 13131 / VPI 4355) OX=190304 GN=FN1450 PE=3 SV=1	133	50440	2	2	2	2	4.9	8.54	0.14
26	tr|Q8RE71|Q8RE71_FUSNN	High-affinity iron permease OS=Fusobacterium nucleatum subsp. nucleatum (strain ATCC 25586 / DSM 15643 / BCRC 10681 / CIP 101130 / JCM 8532 / KCTC 2640 / LMG 13131 / VPI 4355) OX=190304 GN=FN1251 PE=3 SV=1	127	48801	3	3	3	3	8.5	6.69	0.22
27	tr|Q8RHT4|Q8RHT4_FUSNN	Outer membrane protein OS=Fusobacterium nucleatum subsp. nucleatum (strain ATCC 25586 / DSM 15643 / BCRC 10681 / CIP 101130 / JCM 8532 / KCTC 2640 / LMG 13131 / VPI 4355) OX=190304 GN=FN1911 PE=4 SV=1	122	76182	5	5	5	5	8	8.57	0.23
28	tr|Q8RIC2|Q8RIC2_FUSNN	LPS biosynthesis protein WbpG OS=Fusobacterium nucleatum subsp. nucleatum (strain ATCC 25586 / DSM 15643 / BCRC 10681 / CIP 101130 / JCM 8532 / KCTC 2640 / LMG 13131 / VPI 4355) OX=190304 GN=FN1679 PE=4 SV=1	118	43451	5	5	5	5	13.4	6.41	0.44
29	tr|Q8RFU3|Q8RFU3_FUSNN	Putative efflux pump component MtrF OS=Fusobacterium nucleatum subsp. nucleatum (strain ATCC 25586 / DSM 15643 / BCRC 10681 / CIP 101130 / JCM 8532 / KCTC 2640 / LMG 13131 / VPI 4355) OX=190304 GN=FN0591 PE=4 SV=1	118	55377	3	3	3	3	6.1	9.31	0.19
30	tr|Q8RFE7|Q8RFE7_FUSNN	Cell shape-determining protein MreB OS=Fusobacterium nucleatum subsp. nucleatum (strain ATCC 25586 / DSM 15643 / BCRC 10681 / CIP 101130 / JCM 8532 / KCTC 2640 / LMG 13131 / VPI 4355) OX=190304 GN=mreB PE=3 SV=1	117	38733	8	8	7	7	20.1	6.79	0.93
31	tr|Q8RFN9|Q8RFN9_FUSNN	Glyceraldehyde-3-phosphate dehydrogenase OS=Fusobacterium nucleatum subsp. nucleatum (strain ATCC 25586 / DSM 15643 / BCRC 10681 / CIP 101130 / JCM 8532 / KCTC 2640 / LMG 13131 / VPI 4355) OX=190304 GN=FN0652 PE=3 SV=1	113	36054	4	4	4	4	11.3	5.72	0.42
32	sp|Q8RHX3|KDD_FUSNN	L-erythro-3,5-diaminohexanoate dehydrogenase OS=Fusobacterium nucleatum subsp. nucleatum (strain ATCC 25586 / DSM 15643 / BCRC 10681 / CIP 101130 / JCM 8532 / KCTC 2640 / LMG 13131 / VPI 4355) OX=190304 GN=kdd PE=1 SV=1	111	37097	5	5	3	3	8.4	5.49	0.29
33	tr|Q8RHR0|Q8RHR0_FUSNN	Uncharacterized protein OS=Fusobacterium nucleatum subsp. nucleatum (strain ATCC 25586 / DSM 15643 / BCRC 10681 / CIP 101130 / JCM 8532 / KCTC 2640 / LMG 13131 / VPI 4355) OX=190304 GN=FN1939 PE=4 SV=1	109	38319	5	5	5	5	10.5	8.94	0.51
34	tr|Q8RGG7|Q8RGG7_FUSNN	DUF2262 domain-containing protein OS=Fusobacterium nucleatum subsp. nucleatum (strain ATCC 25586 / DSM 15643 / BCRC 10681 / CIP 101130 / JCM 8532 / KCTC 2640 / LMG 13131 / VPI 4355) OX=190304 GN=FN0331 PE=4 SV=1	108	37860	4	4	4	4	13.1	5.2	0.4
35	tr|A0A068B7P9|A0A068B7P9_FUSNN	Fusolisin OS=Fusobacterium nucleatum subsp. nucleatum (strain ATCC 25586 / DSM 15643 / BCRC 10681 / CIP 101130 / JCM 8532 / KCTC 2640 / LMG 13131 / VPI 4355) OX=190304 PE=4 SV=1	103	111278	3	3	3	3	2.9	9.25	0.09
36	sp|Q8RHB4|SYFA_FUSNN	Phenylalanine--tRNA ligase alpha subunit OS=Fusobacterium nucleatum subsp. nucleatum (strain ATCC 25586 / DSM 15643 / BCRC 10681 / CIP 101130 / JCM 8532 / KCTC 2640 / LMG 13131 / VPI 4355) OX=190304 GN=pheS PE=3 SV=1	101	39485	4	4	4	4	10.1	5.72	0.38
37	tr|Q8RHU4|Q8RHU4_FUSNN	Hypothetical lipoprotein OS=Fusobacterium nucleatum subsp. nucleatum (strain ATCC 25586 / DSM 15643 / BCRC 10681 / CIP 101130 / JCM 8532 / KCTC 2640 / LMG 13131 / VPI 4355) OX=190304 GN=FN1899 PE=4 SV=1	94	45273	5	5	4	4	10.8	4.85	0.42
38	tr|Q8RDV2|Q8RDV2_FUSNN	Amino acid carrier protein alsT OS=Fusobacterium nucleatum subsp. nucleatum (strain ATCC 25586 / DSM 15643 / BCRC 10681 / CIP 101130 / JCM 8532 / KCTC 2640 / LMG 13131 / VPI 4355) OX=190304 GN=FN1398 PE=3 SV=1	93	50415	2	2	2	2	8.1	9.18	0.14
39	tr|Q8RFR9|Q8RFR9_FUSNN	Spermidine/putrescine-binding protein OS=Fusobacterium nucleatum subsp. nucleatum (strain ATCC 25586 / DSM 15643 / BCRC 10681 / CIP 101130 / JCM 8532 / KCTC 2640 / LMG 13131 / VPI 4355) OX=190304 GN=FN0618 PE=3 SV=1	93	39742	5	5	3	3	6.4	4.69	0.38
40	tr|Q8REE2|Q8REE2_FUSNN	D-galactose-binding periplasmic protein OS=Fusobacterium nucleatum subsp. nucleatum (strain ATCC 25586 / DSM 15643 / BCRC 10681 / CIP 101130 / JCM 8532 / KCTC 2640 / LMG 13131 / VPI 4355) OX=190304 GN=FN1165 PE=3 SV=1	91	36486	2	2	2	2	6.7	4.74	0.19
41	tr|Q8RG11|Q8RG11_FUSNN	D-lactate dehydrogenase OS=Fusobacterium nucleatum subsp. nucleatum (strain ATCC 25586 / DSM 15643 / BCRC 10681 / CIP 101130 / JCM 8532 / KCTC 2640 / LMG 13131 / VPI 4355) OX=190304 GN=FN0511 PE=1 SV=1	85	38083	2	2	2	2	6.9	5.39	0.18
42	tr|Q8RFL0|Q8RFL0_FUSNN	Sodium/pantothenate symporter OS=Fusobacterium nucleatum subsp. nucleatum (strain ATCC 25586 / DSM 15643 / BCRC 10681 / CIP 101130 / JCM 8532 / KCTC 2640 / LMG 13131 / VPI 4355) OX=190304 GN=FN0685 PE=3 SV=1	84	52556	5	5	4	4	7	9.55	0.28
43	tr|Q8RGA7|Q8RGA7_FUSNN	Dipeptide transport ATP-binding protein dppD OS=Fusobacterium nucleatum subsp. nucleatum (strain ATCC 25586 / DSM 15643 / BCRC 10681 / CIP 101130 / JCM 8532 / KCTC 2640 / LMG 13131 / VPI 4355) OX=190304 GN=FN0399 PE=4 SV=1	81	37056	4	4	4	4	11.9	5.04	0.41
44	sp|Q8R6A7|GLMM_FUSNN	Phosphoglucosamine mutase OS=Fusobacterium nucleatum subsp. nucleatum (strain ATCC 25586 / DSM 15643 / BCRC 10681 / CIP 101130 / JCM 8532 / KCTC 2640 / LMG 13131 / VPI 4355) OX=190304 GN=glmM PE=3 SV=1	80	50150	4	4	4	4	7.5	6.17	0.29
45	tr|Q8RG53|Q8RG53_FUSNN	Uncharacterized protein OS=Fusobacterium nucleatum subsp. nucleatum (strain ATCC 25586 / DSM 15643 / BCRC 10681 / CIP 101130 / JCM 8532 / KCTC 2640 / LMG 13131 / VPI 4355) OX=190304 GN=FN0465 PE=4 SV=1	78	45704	4	4	4	4	9.8	9.05	0.32
46	tr|Q8REE4|Q8REE4_FUSNN	Thioredoxin reductase OS=Fusobacterium nucleatum subsp. nucleatum (strain ATCC 25586 / DSM 15643 / BCRC 10681 / CIP 101130 / JCM 8532 / KCTC 2640 / LMG 13131 / VPI 4355) OX=190304 GN=FN1163 PE=4 SV=1	75	35455	2	2	2	2	5.6	5.97	0.2
47	tr|Q8RDQ9|Q8RDQ9_FUSNN	Fusobacterium outer membrane protein family OS=Fusobacterium nucleatum subsp. nucleatum (strain ATCC 25586 / DSM 15643 / BCRC 10681 / CIP 101130 / JCM 8532 / KCTC 2640 / LMG 13131 / VPI 4355) OX=190304 GN=FN1449 PE=4 SV=1	72	331652	3	3	3	3	1.1	8.9	0.03
48	tr|Q8RGB0|Q8RGB0_FUSNN	Dipeptide-binding protein OS=Fusobacterium nucleatum subsp. nucleatum (strain ATCC 25586 / DSM 15643 / BCRC 10681 / CIP 101130 / JCM 8532 / KCTC 2640 / LMG 13131 / VPI 4355) OX=190304 GN=FN0396 PE=3 SV=1	71	57187	3	3	3	3	7.6	5.07	0.18
49	tr|Q8R5N6|Q8R5N6_FUSNN	Sensory Transduction Protein Kinase OS=Fusobacterium nucleatum subsp. nucleatum (strain ATCC 25586 / DSM 15643 / BCRC 10681 / CIP 101130 / JCM 8532 / KCTC 2640 / LMG 13131 / VPI 4355) OX=190304 GN=FN1260 PE=4 SV=1	71	50820	11	11	1	1	1.6	6.95	0.06
50	tr|Q8RDW9|Q8RDW9_FUSNN	Citrate-sodium symport OS=Fusobacterium nucleatum subsp. nucleatum (strain ATCC 25586 / DSM 15643 / BCRC 10681 / CIP 101130 / JCM 8532 / KCTC 2640 / LMG 13131 / VPI 4355) OX=190304 GN=FN1375 PE=3 SV=1	68	48837	2	2	2	2	5.1	8.8	0.14
51	tr|Q8RFA1|Q8RFA1_FUSNN	Propionate permease OS=Fusobacterium nucleatum subsp. nucleatum (strain ATCC 25586 / DSM 15643 / BCRC 10681 / CIP 101130 / JCM 8532 / KCTC 2640 / LMG 13131 / VPI 4355) OX=190304 GN=FN0815 PE=4 SV=1	67	47557	3	3	2	2	5.1	8.57	0.22
52	tr|Q8RE94|Q8RE94_FUSNN	Cysteine synthase OS=Fusobacterium nucleatum subsp. nucleatum (strain ATCC 25586 / DSM 15643 / BCRC 10681 / CIP 101130 / JCM 8532 / KCTC 2640 / LMG 13131 / VPI 4355) OX=190304 GN=FN1220 PE=1 SV=1	61	34834	2	2	2	2	7.3	5.52	0.2
53	tr|Q8RHQ6|Q8RHQ6_FUSNN	Tryptophanase OS=Fusobacterium nucleatum subsp. nucleatum (strain ATCC 25586 / DSM 15643 / BCRC 10681 / CIP 101130 / JCM 8532 / KCTC 2640 / LMG 13131 / VPI 4355) OX=190304 GN=FN1943 PE=4 SV=1	60	62452	1	1	1	1	2	5.52	0.05
54	tr|Q8RHY2|Q8RHY2_FUSNN	Short-chain fatty acids transporter OS=Fusobacterium nucleatum subsp. nucleatum (strain ATCC 25586 / DSM 15643 / BCRC 10681 / CIP 101130 / JCM 8532 / KCTC 2640 / LMG 13131 / VPI 4355) OX=190304 GN=FN1858 PE=4 SV=1	59	49418	3	3	3	3	7.2	9.07	0.21
55	sp|Q8RI93|SECA_FUSNN	Protein translocase subunit SecA OS=Fusobacterium nucleatum subsp. nucleatum (strain ATCC 25586 / DSM 15643 / BCRC 10681 / CIP 101130 / JCM 8532 / KCTC 2640 / LMG 13131 / VPI 4355) OX=190304 GN=secA PE=3 SV=1	55	100117	1	1	1	1	1.4	5.55	0.03
56	tr|Q8RDS4|Q8RDS4_FUSNN	Leucine-, isoleucine-, valine-, threonine-, and alanine-binding protein OS=Fusobacterium nucleatum subsp. nucleatum (strain ATCC 25586 / DSM 15643 / BCRC 10681 / CIP 101130 / JCM 8532 / KCTC 2640 / LMG 13131 / VPI 4355) OX=190304 GN=FN1432 PE=3 SV=1	54	41241	2	2	2	2	4.7	4.71	0.17
57	tr|Q8RIB4|Q8RIB4_FUSNN	Uncharacterized protein OS=Fusobacterium nucleatum subsp. nucleatum (strain ATCC 25586 / DSM 15643 / BCRC 10681 / CIP 101130 / JCM 8532 / KCTC 2640 / LMG 13131 / VPI 4355) OX=190304 GN=FN1690 PE=4 SV=1	53	31703	3	3	3	3	10.3	9.1	0.35
58	tr|Q8RE52|Q8RE52_FUSNN	Acriflavin resistance protein E OS=Fusobacterium nucleatum subsp. nucleatum (strain ATCC 25586 / DSM 15643 / BCRC 10681 / CIP 101130 / JCM 8532 / KCTC 2640 / LMG 13131 / VPI 4355) OX=190304 GN=FN1274 PE=3 SV=1	51	40912	1	1	1	1	2.7	5.99	0.08
59	sp|Q8RG40|ISPG_FUSNN	4-hydroxy-3-methylbut-2-en-1-yl diphosphate synthase (flavodoxin) OS=Fusobacterium nucleatum subsp. nucleatum (strain ATCC 25586 / DSM 15643 / BCRC 10681 / CIP 101130 / JCM 8532 / KCTC 2640 / LMG 13131 / VPI 4355) OX=190304 GN=ispG PE=3 SV=1	49	39120	1	1	1	1	2.8	8.38	0.08
60	tr|Q8RGR5|Q8RGR5_FUSNN	Carbon starvation protein A OS=Fusobacterium nucleatum subsp. nucleatum (strain ATCC 25586 / DSM 15643 / BCRC 10681 / CIP 101130 / JCM 8532 / KCTC 2640 / LMG 13131 / VPI 4355) OX=190304 GN=FN0221 PE=3 SV=1	48	51345	3	3	3	3	5.1	8.86	0.2
61	sp|Q8RF63|GLGC_FUSNN	Glucose-1-phosphate adenylyltransferase OS=Fusobacterium nucleatum subsp. nucleatum (strain ATCC 25586 / DSM 15643 / BCRC 10681 / CIP 101130 / JCM 8532 / KCTC 2640 / LMG 13131 / VPI 4355) OX=190304 GN=glgC PE=3 SV=1	47	43553	4	4	4	4	13	5.81	0.34
62	sp|Q8RHD0|GAL1_FUSNN	Galactokinase OS=Fusobacterium nucleatum subsp. nucleatum (strain ATCC 25586 / DSM 15643 / BCRC 10681 / CIP 101130 / JCM 8532 / KCTC 2640 / LMG 13131 / VPI 4355) OX=190304 GN=galK PE=3 SV=1	46	44010	1	1	1	1	2.6	5.46	0.08
63	sp|Q8RFY0|RECA_FUSNN	Protein RecA OS=Fusobacterium nucleatum subsp. nucleatum (strain ATCC 25586 / DSM 15643 / BCRC 10681 / CIP 101130 / JCM 8532 / KCTC 2640 / LMG 13131 / VPI 4355) OX=190304 GN=recA PE=3 SV=2	45	40488	1	1	1	1	4	5.5	0.08
64	sp|Q8RGR0|PDXA2_FUSNN	Putative D-threonate 4-phosphate dehydrogenase OS=Fusobacterium nucleatum subsp. nucleatum (strain ATCC 25586 / DSM 15643 / BCRC 10681 / CIP 101130 / JCM 8532 / KCTC 2640 / LMG 13131 / VPI 4355) OX=190304 GN=FN0226 PE=3 SV=1	44	36866	2	2	2	2	5.4	6.17	0.19
65	tr|Q8RHB8|Q8RHB8_FUSNN	Hypothetical exported 24-amino acid repeat protein OS=Fusobacterium nucleatum subsp. nucleatum (strain ATCC 25586 / DSM 15643 / BCRC 10681 / CIP 101130 / JCM 8532 / KCTC 2640 / LMG 13131 / VPI 4355) OX=190304 GN=FN2119 PE=4 SV=1	44	38694	2	2	2	2	5.9	9.12	0.18
66	tr|Q8RGN7|Q8RGN7_FUSNN	Fusobacterium outer membrane protein family OS=Fusobacterium nucleatum subsp. nucleatum (strain ATCC 25586 / DSM 15643 / BCRC 10681 / CIP 101130 / JCM 8532 / KCTC 2640 / LMG 13131 / VPI 4355) OX=190304 GN=FN0254 PE=4 SV=1	44	175889	2	2	2	2	1.5	9.05	0.04
67	tr|Q8RFU0|Q8RFU0_FUSNN	Lipid-A-disaccharide synthase OS=Fusobacterium nucleatum subsp. nucleatum (strain ATCC 25586 / DSM 15643 / BCRC 10681 / CIP 101130 / JCM 8532 / KCTC 2640 / LMG 13131 / VPI 4355) OX=190304 GN=FN0597 PE=4 SV=1	43	41618	3	3	3	3	7.3	8.9	0.26
68	tr|Q8REH0|Q8REH0_FUSNN	N-acetylglucosamine-6-phosphate deacetylase OS=Fusobacterium nucleatum subsp. nucleatum (strain ATCC 25586 / DSM 15643 / BCRC 10681 / CIP 101130 / JCM 8532 / KCTC 2640 / LMG 13131 / VPI 4355) OX=190304 GN=FN1133 PE=3 SV=1	43	42439	1	1	1	1	3.4	5.98	0.08
69	tr|Q8RFY6|Q8RFY6_FUSNN	Polysaccharide deacetylase OS=Fusobacterium nucleatum subsp. nucleatum (strain ATCC 25586 / DSM 15643 / BCRC 10681 / CIP 101130 / JCM 8532 / KCTC 2640 / LMG 13131 / VPI 4355) OX=190304 GN=FN0541 PE=4 SV=1	43	42045	1	1	1	1	2	9.19	0.08
70	sp|Q8R603|EFTU_FUSNN	Elongation factor Tu OS=Fusobacterium nucleatum subsp. nucleatum (strain ATCC 25586 / DSM 15643 / BCRC 10681 / CIP 101130 / JCM 8532 / KCTC 2640 / LMG 13131 / VPI 4355) OX=190304 GN=tuf PE=3 SV=1	43	43544	2	2	2	2	7.1	5.18	0.16
71	tr|Q8RE65|Q8RE65_FUSNN	C4-dicarboxylate-binding protein OS=Fusobacterium nucleatum subsp. nucleatum (strain ATCC 25586 / DSM 15643 / BCRC 10681 / CIP 101130 / JCM 8532 / KCTC 2640 / LMG 13131 / VPI 4355) OX=190304 GN=FN1258 PE=1 SV=1	42	37342	1	1	1	1	4.2	4.9	0.09
72	sp|Q8RHX4|KAMA_FUSNN	L-lysine 2,3-aminomutase OS=Fusobacterium nucleatum subsp. nucleatum (strain ATCC 25586 / DSM 15643 / BCRC 10681 / CIP 101130 / JCM 8532 / KCTC 2640 / LMG 13131 / VPI 4355) OX=190304 GN=kamA PE=1 SV=1	41	49172	1	1	1	1	2.1	6.04	0.07
73	tr|Q8RE77|Q8RE77_FUSNN	Polysaccharide deacetylase OS=Fusobacterium nucleatum subsp. nucleatum (strain ATCC 25586 / DSM 15643 / BCRC 10681 / CIP 101130 / JCM 8532 / KCTC 2640 / LMG 13131 / VPI 4355) OX=190304 GN=FN1242 PE=4 SV=1	40	42981	1	1	1	1	3.1	9.18	0.08
74	tr|Q8RHP5|Q8RHP5_FUSNN	Tetratricopeptide repeat family protein OS=Fusobacterium nucleatum subsp. nucleatum (strain ATCC 25586 / DSM 15643 / BCRC 10681 / CIP 101130 / JCM 8532 / KCTC 2640 / LMG 13131 / VPI 4355) OX=190304 GN=FN1965 PE=4 SV=1	39	40547	1	1	1	1	3.8	4.66	0.08
75	tr|Q8R6B4|Q8R6B4_FUSNN	(R)-2-hydroxyglutaryl-CoA dehydratase alpha-subunit OS=Fusobacterium nucleatum subsp. nucleatum (strain ATCC 25586 / DSM 15643 / BCRC 10681 / CIP 101130 / JCM 8532 / KCTC 2640 / LMG 13131 / VPI 4355) OX=190304 GN=FN0207 PE=3 SV=1	39	50747	1	1	1	1	3.2	5.33	0.06
76	sp|Q8RIA5|HLDD_FUSNN	ADP-L-glycero-D-manno-heptose-6-epimerase OS=Fusobacterium nucleatum subsp. nucleatum (strain ATCC 25586 / DSM 15643 / BCRC 10681 / CIP 101130 / JCM 8532 / KCTC 2640 / LMG 13131 / VPI 4355) OX=190304 GN=hldD PE=3 SV=1	39	38997	3	3	3	3	7.5	5.87	0.28
77	tr|Q8RFV1|Q8RFV1_FUSNN	Lipoprotein releasing system transmembrane protein lolE OS=Fusobacterium nucleatum subsp. nucleatum (strain ATCC 25586 / DSM 15643 / BCRC 10681 / CIP 101130 / JCM 8532 / KCTC 2640 / LMG 13131 / VPI 4355) OX=190304 GN=FN0581 PE=4 SV=1	38	43231	2	2	2	2	4.4	5.8	0.16
78	tr|Q8RDY8|Q8RDY8_FUSNN	ABC transporter permease protein OS=Fusobacterium nucleatum subsp. nucleatum (strain ATCC 25586 / DSM 15643 / BCRC 10681 / CIP 101130 / JCM 8532 / KCTC 2640 / LMG 13131 / VPI 4355) OX=190304 GN=FN1353 PE=4 SV=1	38	44347	1	1	1	1	2.8	8.22	0.07
79	sp|Q8R622|DXR_FUSNN	1-deoxy-D-xylulose 5-phosphate reductoisomerase OS=Fusobacterium nucleatum subsp. nucleatum (strain ATCC 25586 / DSM 15643 / BCRC 10681 / CIP 101130 / JCM 8532 / KCTC 2640 / LMG 13131 / VPI 4355) OX=190304 GN=dxr PE=3 SV=2	35	43585	2	2	2	2	3.4	6	0.16
80	tr|Q8RFZ8|Q8RFZ8_FUSNN	Alanyl-tRNA synthetase OS=Fusobacterium nucleatum subsp. nucleatum (strain ATCC 25586 / DSM 15643 / BCRC 10681 / CIP 101130 / JCM 8532 / KCTC 2640 / LMG 13131 / VPI 4355) OX=190304 GN=FN0527 PE=4 SV=1	34	43238	1	1	1	1	2.4	5.55	0.08
81	sp|Q8RH11|SYS_FUSNN	Serine--tRNA ligase OS=Fusobacterium nucleatum subsp. nucleatum (strain ATCC 25586 / DSM 15643 / BCRC 10681 / CIP 101130 / JCM 8532 / KCTC 2640 / LMG 13131 / VPI 4355) OX=190304 GN=serS PE=3 SV=2	34	48701	1	1	1	1	2.6	5.34	0.07
82	sp|Q8RH03|DNAJ_FUSNN	Chaperone protein DnaJ OS=Fusobacterium nucleatum subsp. nucleatum (strain ATCC 25586 / DSM 15643 / BCRC 10681 / CIP 101130 / JCM 8532 / KCTC 2640 / LMG 13131 / VPI 4355) OX=190304 GN=dnaJ PE=3 SV=1	34	43460	2	2	2	2	4.8	8.35	0.16
83	tr|Q8RDQ7|Q8RDQ7_FUSNN	Cell division protein FtsZ OS=Fusobacterium nucleatum subsp. nucleatum (strain ATCC 25586 / DSM 15643 / BCRC 10681 / CIP 101130 / JCM 8532 / KCTC 2640 / LMG 13131 / VPI 4355) OX=190304 GN=ftsZ PE=3 SV=1	33	38696	1	1	1	1	3.3	4.78	0.09
84	tr|Q8RG28|Q8RG28_FUSNN	Alanine racemase OS=Fusobacterium nucleatum subsp. nucleatum (strain ATCC 25586 / DSM 15643 / BCRC 10681 / CIP 101130 / JCM 8532 / KCTC 2640 / LMG 13131 / VPI 4355) OX=190304 GN=FN0491 PE=4 SV=1	33	41368	2	2	1	1	3.1	6.47	0.17
85	tr|Q8RDT1|Q8RDT1_FUSNN	Flavoprotein OS=Fusobacterium nucleatum subsp. nucleatum (strain ATCC 25586 / DSM 15643 / BCRC 10681 / CIP 101130 / JCM 8532 / KCTC 2640 / LMG 13131 / VPI 4355) OX=190304 GN=FN1423 PE=3 SV=1	32	46726	1	1	1	1	2	5.56	0.07
86	tr|Q8REM5|Q8REM5_FUSNN	Signal recognition particle receptor FtsY OS=Fusobacterium nucleatum subsp. nucleatum (strain ATCC 25586 / DSM 15643 / BCRC 10681 / CIP 101130 / JCM 8532 / KCTC 2640 / LMG 13131 / VPI 4355) OX=190304 GN=ftsY PE=3 SV=1	32	37252	2	2	2	2	6	5.34	0.19
87	tr|Q8RHG1|Q8RHG1_FUSNN	Uncharacterized protein OS=Fusobacterium nucleatum subsp. nucleatum (strain ATCC 25586 / DSM 15643 / BCRC 10681 / CIP 101130 / JCM 8532 / KCTC 2640 / LMG 13131 / VPI 4355) OX=190304 GN=FN2075 PE=4 SV=1	31	36255	2	2	2	2	5.2	5.54	0.19
88	sp|Q8RH08|HRCA_FUSNN	Heat-inducible transcription repressor HrcA OS=Fusobacterium nucleatum subsp. nucleatum (strain ATCC 25586 / DSM 15643 / BCRC 10681 / CIP 101130 / JCM 8532 / KCTC 2640 / LMG 13131 / VPI 4355) OX=190304 GN=hrcA PE=3 SV=1	31	40281	1	1	1	1	3.1	5.2	0.08
89	tr|Q8RE53|Q8RE53_FUSNN	Outer membrane protein tolC OS=Fusobacterium nucleatum subsp. nucleatum (strain ATCC 25586 / DSM 15643 / BCRC 10681 / CIP 101130 / JCM 8532 / KCTC 2640 / LMG 13131 / VPI 4355) OX=190304 GN=FN1273 PE=3 SV=1	29	46962	1	1	1	1	2.4	6.73	0.07
90	tr|Q8RGL2|Q8RGL2_FUSNN	Lipoprotein OS=Fusobacterium nucleatum subsp. nucleatum (strain ATCC 25586 / DSM 15643 / BCRC 10681 / CIP 101130 / JCM 8532 / KCTC 2640 / LMG 13131 / VPI 4355) OX=190304 GN=FN0279 PE=3 SV=1	27	29697	2	2	2	2	8.1	9.01	0.24
91	tr|Q8RDZ2|Q8RDZ2_FUSNN	ABC transporter permease protein OS=Fusobacterium nucleatum subsp. nucleatum (strain ATCC 25586 / DSM 15643 / BCRC 10681 / CIP 101130 / JCM 8532 / KCTC 2640 / LMG 13131 / VPI 4355) OX=190304 GN=FN1349 PE=4 SV=1	27	44225	1	1	1	1	3.5	8.98	0.07
92	tr|Q8R6E1|Q8R6E1_FUSNN	Oxygen-insensitive NAD(P)H nitroreductase OS=Fusobacterium nucleatum subsp. nucleatum (strain ATCC 25586 / DSM 15643 / BCRC 10681 / CIP 101130 / JCM 8532 / KCTC 2640 / LMG 13131 / VPI 4355) OX=190304 GN=FN1880 PE=4 SV=1	27	21782	1	1	1	1	4.7	5.69	0.15
93	sp|Q8RHI5|RL7_FUSNN	50S ribosomal protein L7/L12 OS=Fusobacterium nucleatum subsp. nucleatum (strain ATCC 25586 / DSM 15643 / BCRC 10681 / CIP 101130 / JCM 8532 / KCTC 2640 / LMG 13131 / VPI 4355) OX=190304 GN=rplL PE=3 SV=1	25	12598	1	1	1	1	6.6	4.7	0.27
94	tr|Q8RDR5|Q8RDR5_FUSNN	PTS system, fructose-specific IIABC component OS=Fusobacterium nucleatum subsp. nucleatum (strain ATCC 25586 / DSM 15643 / BCRC 10681 / CIP 101130 / JCM 8532 / KCTC 2640 / LMG 13131 / VPI 4355) OX=190304 GN=FN1441 PE=4 SV=1	24	65251	1	1	1	1	1.8	6.24	0.05
95	tr|Q8RFR3|Q8RFR3_FUSNN	Aspartate aminotransferase OS=Fusobacterium nucleatum subsp. nucleatum (strain ATCC 25586 / DSM 15643 / BCRC 10681 / CIP 101130 / JCM 8532 / KCTC 2640 / LMG 13131 / VPI 4355) OX=190304 GN=FN0625 PE=4 SV=1	24	46884	2	2	2	2	5	6.36	0.15
96	tr|Q8R6C2|Q8R6C2_FUSNN	NADPH-dependent butanol dehydrogenase OS=Fusobacterium nucleatum subsp. nucleatum (strain ATCC 25586 / DSM 15643 / BCRC 10681 / CIP 101130 / JCM 8532 / KCTC 2640 / LMG 13131 / VPI 4355) OX=190304 GN=FN0092 PE=4 SV=1	23	41706	1	1	1	1	2.2	7.04	0.08
97	tr|Q8RF64|Q8RF64_FUSNN	Glucose-1-phosphate adenylyltransferase OS=Fusobacterium nucleatum subsp. nucleatum (strain ATCC 25586 / DSM 15643 / BCRC 10681 / CIP 101130 / JCM 8532 / KCTC 2640 / LMG 13131 / VPI 4355) OX=190304 GN=FN0854 PE=4 SV=1	22	44485	1	1	1	1	2.6	8.33	0.07
98	tr|Q8RFM8|Q8RFM8_FUSNN	2-nitropropane dioxygenase OS=Fusobacterium nucleatum subsp. nucleatum (strain ATCC 25586 / DSM 15643 / BCRC 10681 / CIP 101130 / JCM 8532 / KCTC 2640 / LMG 13131 / VPI 4355) OX=190304 GN=FN0664 PE=4 SV=1	22	42032	3	3	3	3	7.6	5.96	0.25
99	tr|Q8RGJ8|Q8RGJ8_FUSNN	Transketolase OS=Fusobacterium nucleatum subsp. nucleatum (strain ATCC 25586 / DSM 15643 / BCRC 10681 / CIP 101130 / JCM 8532 / KCTC 2640 / LMG 13131 / VPI 4355) OX=190304 GN=FN0295 PE=4 SV=1	21	33567	1	1	1	1	3.2	5.54	0.1
100	sp|Q8RHR9|CINAL_FUSNN	CinA-like protein OS=Fusobacterium nucleatum subsp. nucleatum (strain ATCC 25586 / DSM 15643 / BCRC 10681 / CIP 101130 / JCM 8532 / KCTC 2640 / LMG 13131 / VPI 4355) OX=190304 GN=FN1929 PE=3 SV=1	21	45232	1	1	1	1	4	9.13	0.07
101	tr|Q8RDQ6|Q8RDQ6_FUSNN	Cell division protein FtsA OS=Fusobacterium nucleatum subsp. nucleatum (strain ATCC 25586 / DSM 15643 / BCRC 10681 / CIP 101130 / JCM 8532 / KCTC 2640 / LMG 13131 / VPI 4355) OX=190304 GN=ftsA PE=3 SV=1	20	50128	1	1	1	1	2	6.61	0.07
102	tr|Q8RFP4|Q8RFP4_FUSNN	Transcriptional regulator OS=Fusobacterium nucleatum subsp. nucleatum (strain ATCC 25586 / DSM 15643 / BCRC 10681 / CIP 101130 / JCM 8532 / KCTC 2640 / LMG 13131 / VPI 4355) OX=190304 GN=FN0647 PE=4 SV=1	20	44889	1	1	1	1	1.9	5.97	0.07
103	sp|Q8RDM4|FOLD_FUSNN	Bifunctional protein FolD OS=Fusobacterium nucleatum subsp. nucleatum (strain ATCC 25586 / DSM 15643 / BCRC 10681 / CIP 101130 / JCM 8532 / KCTC 2640 / LMG 13131 / VPI 4355) OX=190304 GN=folD PE=3 SV=1	20	30638	1	1	1	1	9.5	6.2	0.11
104	sp|Q8RET9|BIOD_FUSNN	ATP-dependent dethiobiotin synthetase BioD OS=Fusobacterium nucleatum subsp. nucleatum (strain ATCC 25586 / DSM 15643 / BCRC 10681 / CIP 101130 / JCM 8532 / KCTC 2640 / LMG 13131 / VPI 4355) OX=190304 GN=bioD PE=3 SV=1	20	25247	1	1	1	1	5.9	7.68	0.13
105	sp|Q8R5Z1|IF2_FUSNN	Translation initiation factor IF-2 OS=Fusobacterium nucleatum subsp. nucleatum (strain ATCC 25586 / DSM 15643 / BCRC 10681 / CIP 101130 / JCM 8532 / KCTC 2640 / LMG 13131 / VPI 4355) OX=190304 GN=infB PE=3 SV=1	18	81821	2	2	1	1	1.1	5.46	0.04
106	tr|Q8RG41|Q8RG41_FUSNN	Cell wall endopeptidase family M23/M37 OS=Fusobacterium nucleatum subsp. nucleatum (strain ATCC 25586 / DSM 15643 / BCRC 10681 / CIP 101130 / JCM 8532 / KCTC 2640 / LMG 13131 / VPI 4355) OX=190304 GN=FN0477 PE=4 SV=1	18	35433	2	2	2	2	5	9.72	0.2
107	tr|Q8REY1|Q8REY1_FUSNN	DUF4130 domain-containing protein OS=Fusobacterium nucleatum subsp. nucleatum (strain ATCC 25586 / DSM 15643 / BCRC 10681 / CIP 101130 / JCM 8532 / KCTC 2640 / LMG 13131 / VPI 4355) OX=190304 GN=FN0953 PE=4 SV=1	18	29138	1	1	1	1	2.9	8.76	0.11
108	tr|Q8R6G0|Q8R6G0_FUSNN	Glycosyl transferase OS=Fusobacterium nucleatum subsp. nucleatum (strain ATCC 25586 / DSM 15643 / BCRC 10681 / CIP 101130 / JCM 8532 / KCTC 2640 / LMG 13131 / VPI 4355) OX=190304 GN=FN1692 PE=4 SV=1	18	31118	1	1	1	1	2.2	9.7	0.11
109	tr|Q8RDM7|Q8RDM7_FUSNN	Transporter OS=Fusobacterium nucleatum subsp. nucleatum (strain ATCC 25586 / DSM 15643 / BCRC 10681 / CIP 101130 / JCM 8532 / KCTC 2640 / LMG 13131 / VPI 4355) OX=190304 GN=FN1485 PE=4 SV=1	18	25573	1	1	1	1	3.1	9.06	0.13
110	tr|Q8RE04|Q8RE04_FUSNN	N-acetylmuramoyl-L-alanine amidase OS=Fusobacterium nucleatum subsp. nucleatum (strain ATCC 25586 / DSM 15643 / BCRC 10681 / CIP 101130 / JCM 8532 / KCTC 2640 / LMG 13131 / VPI 4355) OX=190304 GN=FN1334 PE=4 SV=1	17	37553	1	1	1	1	5.3	6.19	0.09
111	tr|Q8RFR1|Q8RFR1_FUSNN	Glucosamine--fructose-6-phosphate aminotransferase (Isomerizing) OS=Fusobacterium nucleatum subsp. nucleatum (strain ATCC 25586 / DSM 15643 / BCRC 10681 / CIP 101130 / JCM 8532 / KCTC 2640 / LMG 13131 / VPI 4355) OX=190304 GN=FN0627 PE=4 SV=1	17	39199	2	2	2	2	6	5.77	0.18
112	tr|Q8RG05|Q8RG05_FUSNN	Outer membrane protein tolC OS=Fusobacterium nucleatum subsp. nucleatum (strain ATCC 25586 / DSM 15643 / BCRC 10681 / CIP 101130 / JCM 8532 / KCTC 2640 / LMG 13131 / VPI 4355) OX=190304 GN=FN0517 PE=3 SV=1	17	50971	1	1	1	1	1.6	5.2	0.06
113	tr|Q8R6B0|Q8R6B0_FUSNN	Anaerobic ribonucleoside-triphosphate reductase-activating protein OS=Fusobacterium nucleatum subsp. nucleatum (strain ATCC 25586 / DSM 15643 / BCRC 10681 / CIP 101130 / JCM 8532 / KCTC 2640 / LMG 13131 / VPI 4355) OX=190304 GN=FN0312 PE=3 SV=1	17	20000	1	1	1	1	4.2	8.66	0.17
114	tr|Q8RGX4|Q8RGX4_FUSNN	3-oxoacyl-[acyl-carrier-protein] synthase 2 OS=Fusobacterium nucleatum subsp. nucleatum (strain ATCC 25586 / DSM 15643 / BCRC 10681 / CIP 101130 / JCM 8532 / KCTC 2640 / LMG 13131 / VPI 4355) OX=190304 GN=FN0151 PE=3 SV=1	17	44039	1	1	1	1	4.8	5.56	0.07
115	sp|Q8RHI7|RPOC_FUSNN	DNA-directed RNA polymerase subunit beta~ OS=Fusobacterium nucleatum subsp. nucleatum (strain ATCC 25586 / DSM 15643 / BCRC 10681 / CIP 101130 / JCM 8532 / KCTC 2640 / LMG 13131 / VPI 4355) OX=190304 GN=rpoC PE=3 SV=1	16	148694	1	1	1	1	1.1	8.89	0.02
116	tr|Q8RG71|Q8RG71_FUSNN	Uncharacterized protein OS=Fusobacterium nucleatum subsp. nucleatum (strain ATCC 25586 / DSM 15643 / BCRC 10681 / CIP 101130 / JCM 8532 / KCTC 2640 / LMG 13131 / VPI 4355) OX=190304 GN=FN0446 PE=4 SV=1	16	141150	1	1	1	1	1.2	5.8	0.02
117	sp|Q8RIG1|RS3_FUSNN	30S ribosomal protein S3 OS=Fusobacterium nucleatum subsp. nucleatum (strain ATCC 25586 / DSM 15643 / BCRC 10681 / CIP 101130 / JCM 8532 / KCTC 2640 / LMG 13131 / VPI 4355) OX=190304 GN=rpsC PE=3 SV=1	16	24318	1	1	1	1	4.6	9.75	0.14
118	tr|Q8RE39|Q8RE39_FUSNN	Uncharacterized protein OS=Fusobacterium nucleatum subsp. nucleatum (strain ATCC 25586 / DSM 15643 / BCRC 10681 / CIP 101130 / JCM 8532 / KCTC 2640 / LMG 13131 / VPI 4355) OX=190304 GN=FN1289 PE=4 SV=1	16	67660	1	1	1	1	1.2	5.68	0.05
119	tr|Q8RET4|Q8RET4_FUSNN	Uncharacterized protein OS=Fusobacterium nucleatum subsp. nucleatum (strain ATCC 25586 / DSM 15643 / BCRC 10681 / CIP 101130 / JCM 8532 / KCTC 2640 / LMG 13131 / VPI 4355) OX=190304 GN=FN1007 PE=4 SV=1	16	35242	1	1	1	1	2.4	9.71	0.09
120	tr|Q8RGS6|Q8RGS6_FUSNN	Activator of (R)-2-hydroxyglutaryl-CoA dehydratase OS=Fusobacterium nucleatum subsp. nucleatum (strain ATCC 25586 / DSM 15643 / BCRC 10681 / CIP 101130 / JCM 8532 / KCTC 2640 / LMG 13131 / VPI 4355) OX=190304 GN=FN0206 PE=4 SV=1	16	28302	1	1	1	1	6.4	5.99	0.12
121	tr|Q8REW9|Q8REW9_FUSNN	Precorrin-6Y C5,15-methyltransferase (Decarboxylating) OS=Fusobacterium nucleatum subsp. nucleatum (strain ATCC 25586 / DSM 15643 / BCRC 10681 / CIP 101130 / JCM 8532 / KCTC 2640 / LMG 13131 / VPI 4355) OX=190304 GN=FN0966 PE=4 SV=1	16	26341	1	1	1	1	5.2	7.66	0.13
122	tr|Q8RHQ5|Q8RHQ5_FUSNN	Sodium-dependent tryptophan transporter OS=Fusobacterium nucleatum subsp. nucleatum (strain ATCC 25586 / DSM 15643 / BCRC 10681 / CIP 101130 / JCM 8532 / KCTC 2640 / LMG 13131 / VPI 4355) OX=190304 GN=FN1944 PE=4 SV=1	16	49855	1	1	1	1	2.8	8.28	0.07
123	tr|Q8RI06|Q8RI06_FUSNN	TonB protein OS=Fusobacterium nucleatum subsp. nucleatum (strain ATCC 25586 / DSM 15643 / BCRC 10681 / CIP 101130 / JCM 8532 / KCTC 2640 / LMG 13131 / VPI 4355) OX=190304 GN=FN1832 PE=3 SV=1	15	25754	1	1	1	1	4.7	6.69	0.13
124	tr|Q8RGP3|Q8RGP3_FUSNN	Poly(A) polymerase OS=Fusobacterium nucleatum subsp. nucleatum (strain ATCC 25586 / DSM 15643 / BCRC 10681 / CIP 101130 / JCM 8532 / KCTC 2640 / LMG 13131 / VPI 4355) OX=190304 GN=FN0243 PE=3 SV=1	15	52166	2	2	1	1	3.5	5.42	0.06
125	tr|Q8RIH6|Q8RIH6_FUSNN	Protein translocase subunit SecY OS=Fusobacterium nucleatum subsp. nucleatum (strain ATCC 25586 / DSM 15643 / BCRC 10681 / CIP 101130 / JCM 8532 / KCTC 2640 / LMG 13131 / VPI 4355) OX=190304 GN=secY PE=3 SV=1	15	46399	1	1	1	1	3.3	9.42	0.07
126	tr|Q8REA6|Q8REA6_FUSNN	Ribosome biogenesis GTPase A OS=Fusobacterium nucleatum subsp. nucleatum (strain ATCC 25586 / DSM 15643 / BCRC 10681 / CIP 101130 / JCM 8532 / KCTC 2640 / LMG 13131 / VPI 4355) OX=190304 GN=FN1203 PE=3 SV=1	15	33032	1	1	1	1	8	9.57	0.1
127	tr|Q8RF35|Q8RF35_FUSNN	Hemin-binding periplasmic protein hmuT OS=Fusobacterium nucleatum subsp. nucleatum (strain ATCC 25586 / DSM 15643 / BCRC 10681 / CIP 101130 / JCM 8532 / KCTC 2640 / LMG 13131 / VPI 4355) OX=190304 GN=FN0885 PE=4 SV=1	15	31819	1	1	1	1	6.6	9.2	0.1
128	tr|Q8RF69|Q8RF69_FUSNN	8-amino-7-oxononanoate synthase OS=Fusobacterium nucleatum subsp. nucleatum (strain ATCC 25586 / DSM 15643 / BCRC 10681 / CIP 101130 / JCM 8532 / KCTC 2640 / LMG 13131 / VPI 4355) OX=190304 GN=FN0849 PE=4 SV=1	15	44118	1	1	1	1	1.8	8.73	0.07
129	tr|Q8RIB7|Q8RIB7_FUSNN	dTDP-4-dehydrorhamnose reductase OS=Fusobacterium nucleatum subsp. nucleatum (strain ATCC 25586 / DSM 15643 / BCRC 10681 / CIP 101130 / JCM 8532 / KCTC 2640 / LMG 13131 / VPI 4355) OX=190304 GN=FN1685 PE=4 SV=1	15	34211	1	1	1	1	4.8	7.53	0.1
130	tr|Q8RDX2|Q8RDX2_FUSNN	Pseudouridine synthase OS=Fusobacterium nucleatum subsp. nucleatum (strain ATCC 25586 / DSM 15643 / BCRC 10681 / CIP 101130 / JCM 8532 / KCTC 2640 / LMG 13131 / VPI 4355) OX=190304 GN=FN1372 PE=3 SV=1	15	36939	1	1	1	1	7.5	8.55	0.09
131	tr|Q8RFX7|Q8RFX7_FUSNN	Cupin_2 domain-containing protein OS=Fusobacterium nucleatum subsp. nucleatum (strain ATCC 25586 / DSM 15643 / BCRC 10681 / CIP 101130 / JCM 8532 / KCTC 2640 / LMG 13131 / VPI 4355) OX=190304 GN=FN0550 PE=4 SV=1	14	15432	1	1	1	1	13.5	5.95	0.22
132	sp|Q8RI60|THIC_FUSNN	Phosphomethylpyrimidine synthase OS=Fusobacterium nucleatum subsp. nucleatum (strain ATCC 25586 / DSM 15643 / BCRC 10681 / CIP 101130 / JCM 8532 / KCTC 2640 / LMG 13131 / VPI 4355) OX=190304 GN=thiC PE=3 SV=1	14	48750	1	1	1	1	2.5	5.25	0.07
133	tr|Q8RG94|Q8RG94_FUSNN	ATP-dependent helicase HEPA OS=Fusobacterium nucleatum subsp. nucleatum (strain ATCC 25586 / DSM 15643 / BCRC 10681 / CIP 101130 / JCM 8532 / KCTC 2640 / LMG 13131 / VPI 4355) OX=190304 GN=FN0414 PE=4 SV=1	14	118817	1	1	1	1	1.8	5.46	0.03
134	sp|Q8R602|EFG_FUSNN	Elongation factor G OS=Fusobacterium nucleatum subsp. nucleatum (strain ATCC 25586 / DSM 15643 / BCRC 10681 / CIP 101130 / JCM 8532 / KCTC 2640 / LMG 13131 / VPI 4355) OX=190304 GN=fusA PE=3 SV=1	14	77482	1	1	1	1	1.7	5.12	0.04
135	tr|Q8REC0|Q8REC0_FUSNN	Uncharacterized protein OS=Fusobacterium nucleatum subsp. nucleatum (strain ATCC 25586 / DSM 15643 / BCRC 10681 / CIP 101130 / JCM 8532 / KCTC 2640 / LMG 13131 / VPI 4355) OX=190304 GN=FN1189 PE=4 SV=1	14	13834	1	1	1	1	8.6	9.02	0.25
136	tr|Q8REU7|Q8REU7_FUSNN	ADP-heptose:LPS heptosyltransferase II OS=Fusobacterium nucleatum subsp. nucleatum (strain ATCC 25586 / DSM 15643 / BCRC 10681 / CIP 101130 / JCM 8532 / KCTC 2640 / LMG 13131 / VPI 4355) OX=190304 GN=FN0992 PE=4 SV=1	14	42143	1	1	1	1	2	8.9	0.08
137	tr|Q8REW3|Q8REW3_FUSNN	Lactoylglutathione lyase OS=Fusobacterium nucleatum subsp. nucleatum (strain ATCC 25586 / DSM 15643 / BCRC 10681 / CIP 101130 / JCM 8532 / KCTC 2640 / LMG 13131 / VPI 4355) OX=190304 GN=FN0974 PE=4 SV=1	14	16496	1	1	1	1	4.2	5.04	0.2
138	tr|Q8RGV3|Q8RGV3_FUSNN	Enoyl-[acyl-carrier-protein] reductase OS=Fusobacterium nucleatum subsp. nucleatum (strain ATCC 25586 / DSM 15643 / BCRC 10681 / CIP 101130 / JCM 8532 / KCTC 2640 / LMG 13131 / VPI 4355) OX=190304 GN=FN0174 PE=4 SV=1	14	34213	1	1	1	1	2.5	5.83	0.1
139	tr|Q8RDW0|Q8RDW0_FUSNN	Uncharacterized protein OS=Fusobacterium nucleatum subsp. nucleatum (strain ATCC 25586 / DSM 15643 / BCRC 10681 / CIP 101130 / JCM 8532 / KCTC 2640 / LMG 13131 / VPI 4355) OX=190304 GN=FN1385 PE=4 SV=1	14	69546	1	1	1	1	1.2	5.48	0.05
140	tr|Q8RG22|Q8RG22_FUSNN	Plasmid addiction system poison protein OS=Fusobacterium nucleatum subsp. nucleatum (strain ATCC 25586 / DSM 15643 / BCRC 10681 / CIP 101130 / JCM 8532 / KCTC 2640 / LMG 13131 / VPI 4355) OX=190304 GN=FN0497 PE=4 SV=1	13	10665	1	1	1	1	12.2	9.86	0.32
141	tr|Q8REH3|Q8REH3_FUSNN	Tetraacyldisaccharide 4~-kinase OS=Fusobacterium nucleatum subsp. nucleatum (strain ATCC 25586 / DSM 15643 / BCRC 10681 / CIP 101130 / JCM 8532 / KCTC 2640 / LMG 13131 / VPI 4355) OX=190304 GN=lpxK PE=3 SV=1	13	37277	1	1	1	1	4.9	9.73	0.09
142	tr|Q8RDS8|Q8RDS8_FUSNN	Branched-chain amino acid transport ATP-binding protein livF OS=Fusobacterium nucleatum subsp. nucleatum (strain ATCC 25586 / DSM 15643 / BCRC 10681 / CIP 101130 / JCM 8532 / KCTC 2640 / LMG 13131 / VPI 4355) OX=190304 GN=FN1428 PE=4 SV=1	13	26160	1	1	1	1	5.9	8.96	0.13
143	tr|Q8RG03|Q8RG03_FUSNN	Hypothetical exported 24-amino acid repeat protein OS=Fusobacterium nucleatum subsp. nucleatum (strain ATCC 25586 / DSM 15643 / BCRC 10681 / CIP 101130 / JCM 8532 / KCTC 2640 / LMG 13131 / VPI 4355) OX=190304 GN=FN0519 PE=4 SV=1	13	39546	1	1	1	1	1.5	9.25	0.08
